# Supplementary material for: Dual-path modulation of hydrogen peroxide to ameliorate hypoxia for enhancing photodynamic/starvation synergistic therapy
Source: Royal Society of Chemistry journal article supplement (doi:10.1039/d0tb01556c), 2020-01-01
Supplement: d0tb01556c1.pdf [file d0tb01556c1.pdf]

## Electronic Supplementary Information (ESI)

### Dual-path modulation of hydrogen peroxide to ameliorate hypoxia for enhancing photodynamic/starvation synergistic therapy

Xinhe Liu,<sup>a</sup> Jing Liu,<sup>a</sup> Shangyu Chen,<sup>c</sup> Yuxin Xie,<sup>a</sup> Quli Fan,<sup>c</sup> Jiahong Zhou,<sup>d</sup> Jianchun Bao,<sup>a</sup> Tianxiang Wei<sup>\*a,b</sup> and Zhihui Dai<sup>\*a</sup>

<sup>a</sup> Jiangsu Collaborative Innovation Center of Biomedical Functional Materials and Jiangsu Key Laboratory of Biofunctional Materials, School of Chemistry and Materials Science, Nanjing Normal University, Nanjing 210023, China

<sup>b</sup> School of Environment, Nanjing Normal University, Nanjing 210023, China

<sup>c</sup> Key Laboratory for Organic Electronics and Information Displays, Jiangsu National Synergetic Innovation Center for Advanced Materials, Nanjing University of Posts and Telecommunications, Nanjing 210023, China

<sup>d</sup> College of Life Sciences, Nanjing Normal University, Nanjing 210023, China

#### \*Corresponding Authors:

**E-mail:** daizhihui@njnu.edu.cn, **Tel./Fax:** +86-25-85891051

weitian\_xiang@126.com

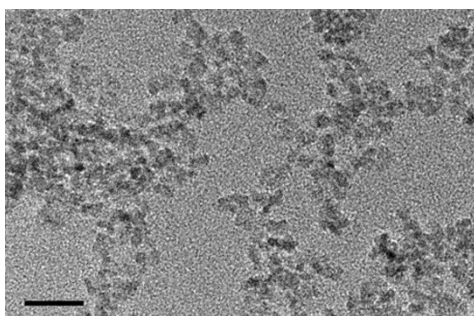

**Fig. S1** TEM image of the CeO<sub>2</sub>-PEG-NH<sub>2</sub>. Scale bar: 20 nm.

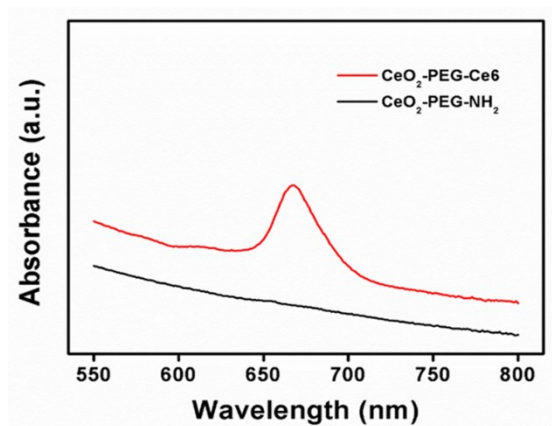

**Fig. S2** UV-vis absorption spectra of CeO<sub>2</sub>-PEG-NH<sub>2</sub> and CeO<sub>2</sub>-PEG-Ce6.

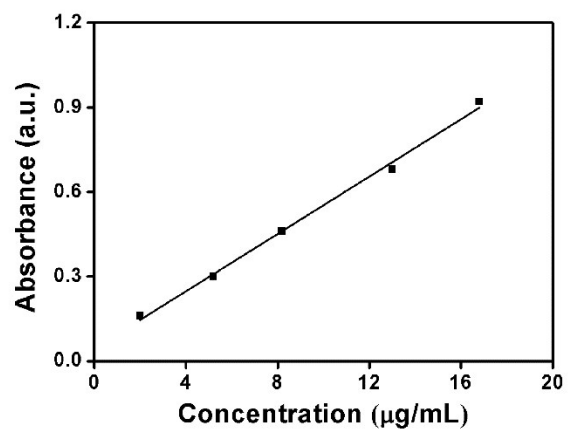

**Fig. S3** The linear relationship between concentration and absorbance of Ce6.

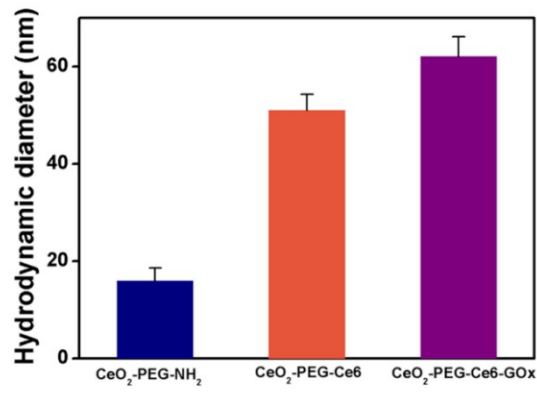

**Fig. S4** Hydrodynamic diameters of CeO<sub>2</sub>-PEG-NH<sub>2</sub>, CeO<sub>2</sub>-PEG-Ce6 and CeO<sub>2</sub>-PEG-Ce6-GOx.

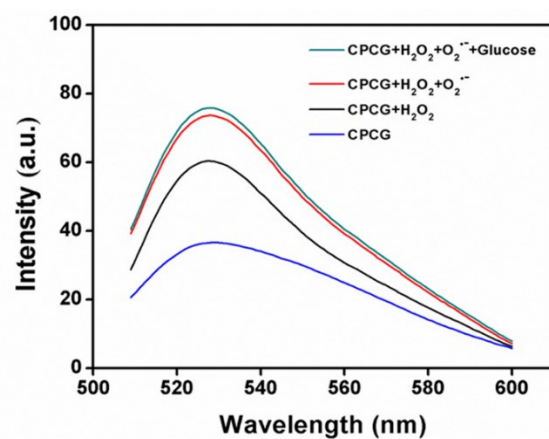

**Fig. S5** The generation of singlet oxygen determining with SOSG in the different samples after irradiation (660 nm, 200 mW cm<sup>-2</sup>, 6 min) under hypoxic condition.

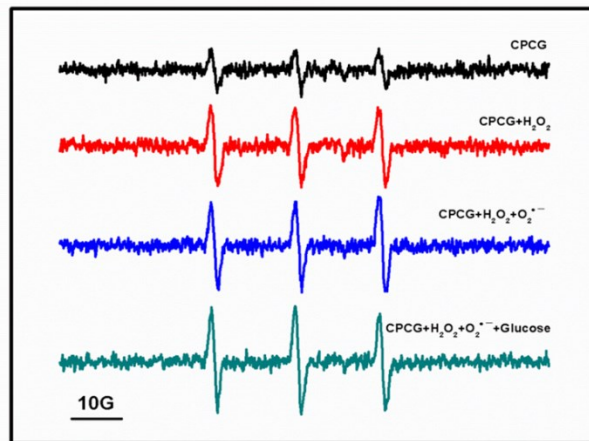

**Fig. S6** ESR spectra of different samples with TEMP as the spin trap with laser light irradiation under hypoxic environment.

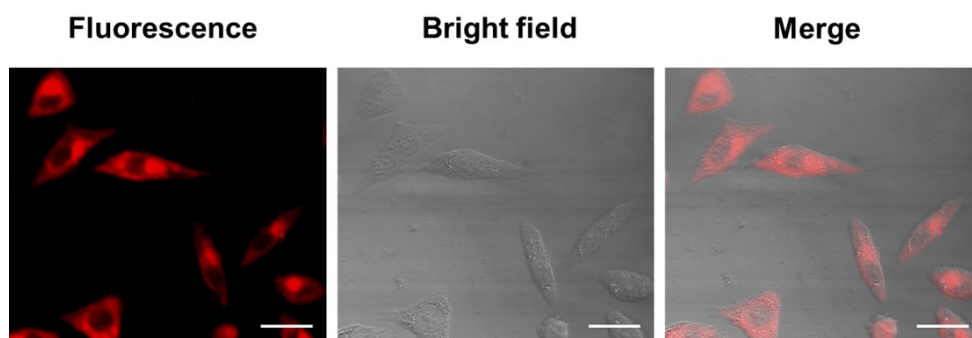

**Fig. S7** Confocal images of HeLa cells incubated with CPG. Scale bar: 20  $\mu\text{m}$ .



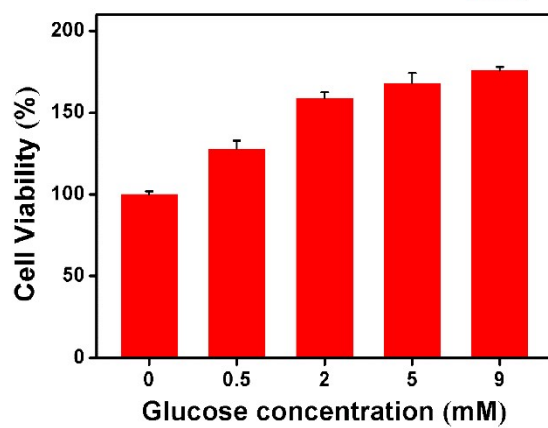

**Fig. S8** The cell viability of HeLa cells in different concentrations of glucose.

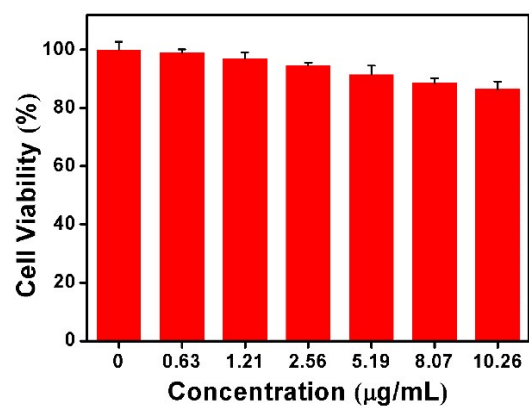

**Fig. S9** Relative cell viability of HeLa cells incubated with different concentrations of free Ce6 under 660 nm laser light irradiation ( $200 \text{ mW cm}^{-2}$ ) in hypoxic environment.

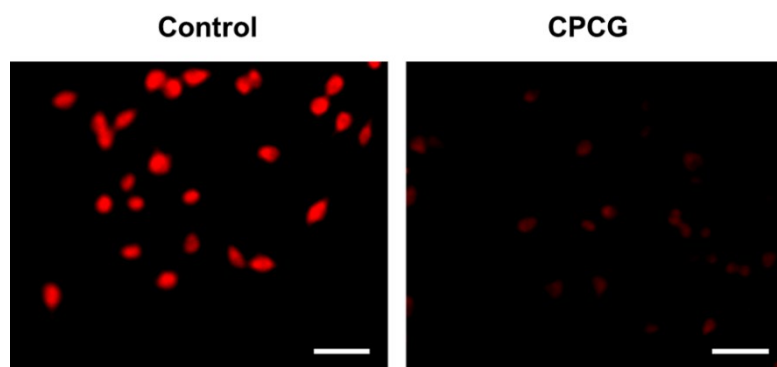

**Fig. S10** Confocal fluorescence images of [Ru(dpp)<sub>3</sub>]Cl<sub>2</sub> in HeLa cells treated with different conditions. Scale bar: 50 μm.
